# Supplementary material for: Cellulose assisted combustion synthesis of porous Cu–Ni nanopowders
Source: Royal Society of Chemistry journal article supplement (doi:10.1039/c5ra03103f), 2015-01-01
Supplement: c5ra03103f1.pdf [file c5ra03103f1.pdf]

**a) SCS Method**

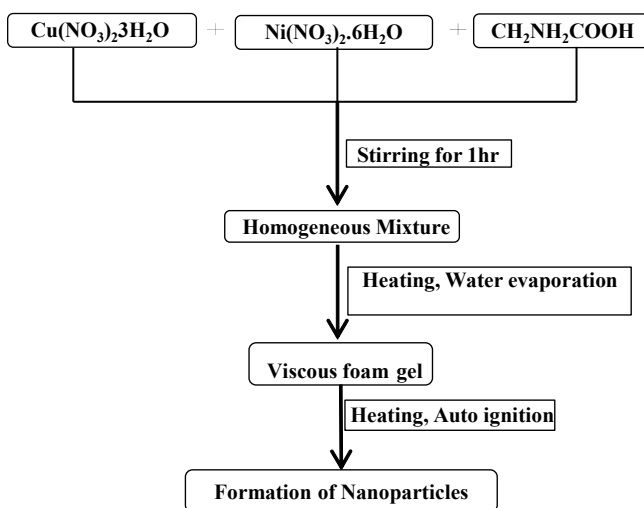

**b) ILCS Method**

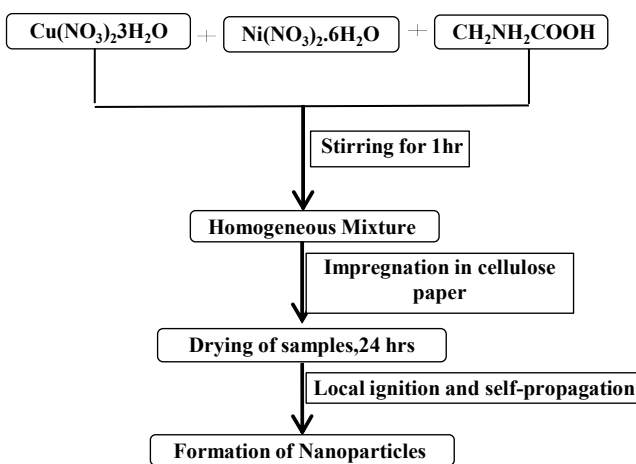

Figure S1: Flow chart shows the method of synthesis of CuNi catalytic alloy using (a) SCS (b) ILCS
